# Supplementary material for: Effects of Anti-CD19 CAR-T Cells in a Murine Model of IgG4- Related Disease
Source: Research Square preprint supplement (doi:10.21203/rs.3.rs-7951070/v1), 2025-11-13
Supplement: Supplementary file 1 [file 2fa15d1990e1940f7564dc25.docx]

**Supplementary Figures**

**
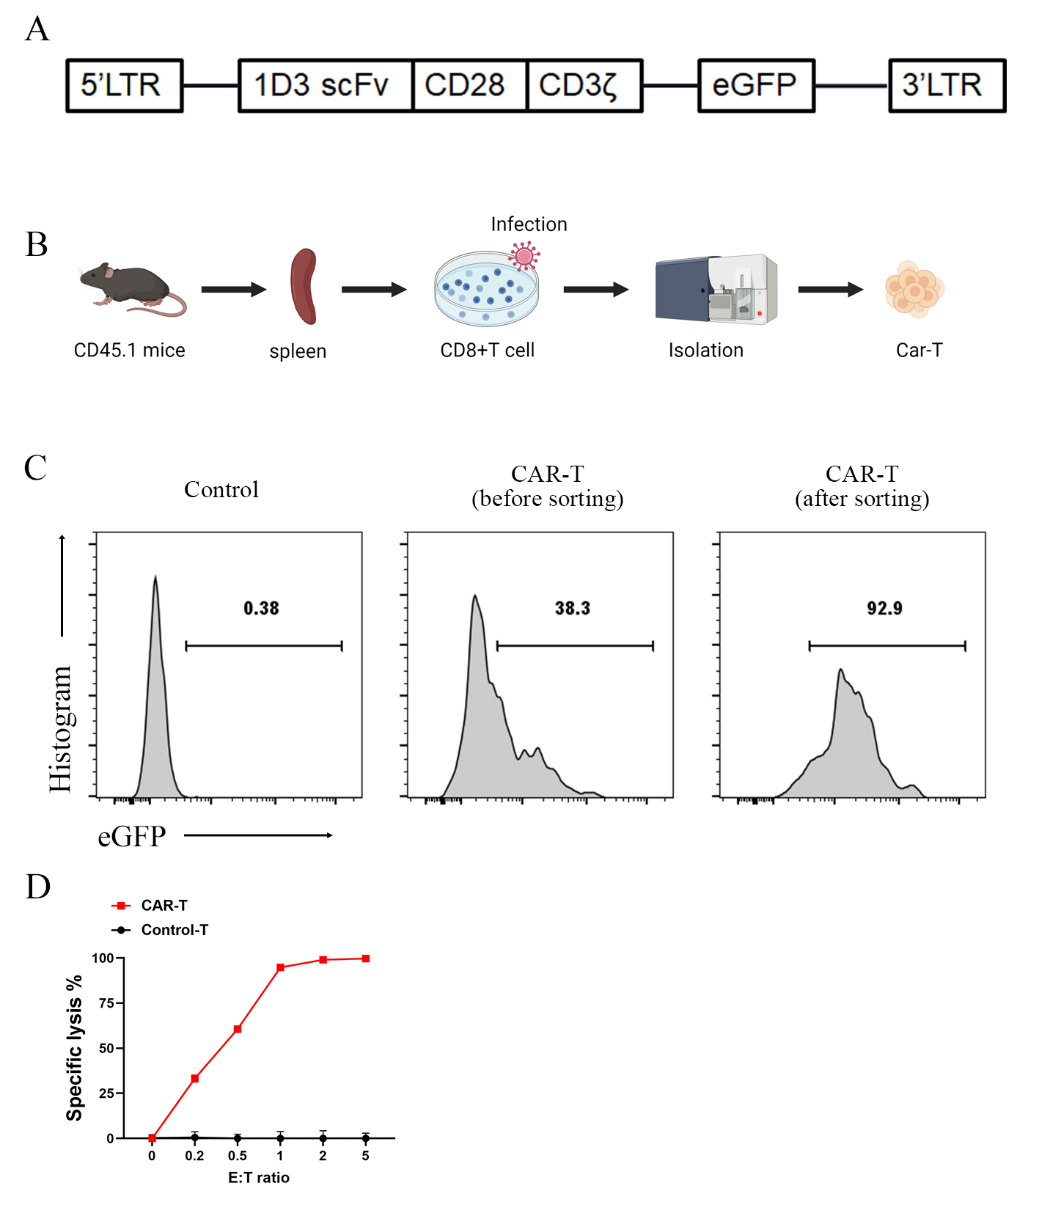
**

**Supplementary Figure 1. Generation of CAR-T cells. A.** Schematic representation of the DNA construct encoding the 1D3-28Z.1-3mut CAR. **B.** Workflow for CAR-T cell production. **C.** Flow cytometric analysis of eGFP expression in mouse primary T cells following retroviral transduction. **D.** Cytotoxicity assay: freshly sorted CD19+ B cells labeled with CellTrace Violet were cocultured with CAR-T cells at the indicated effector-to-target (E:T) ratios for 4 hours. B-cell lysis was quantified by flow cytometry.

**
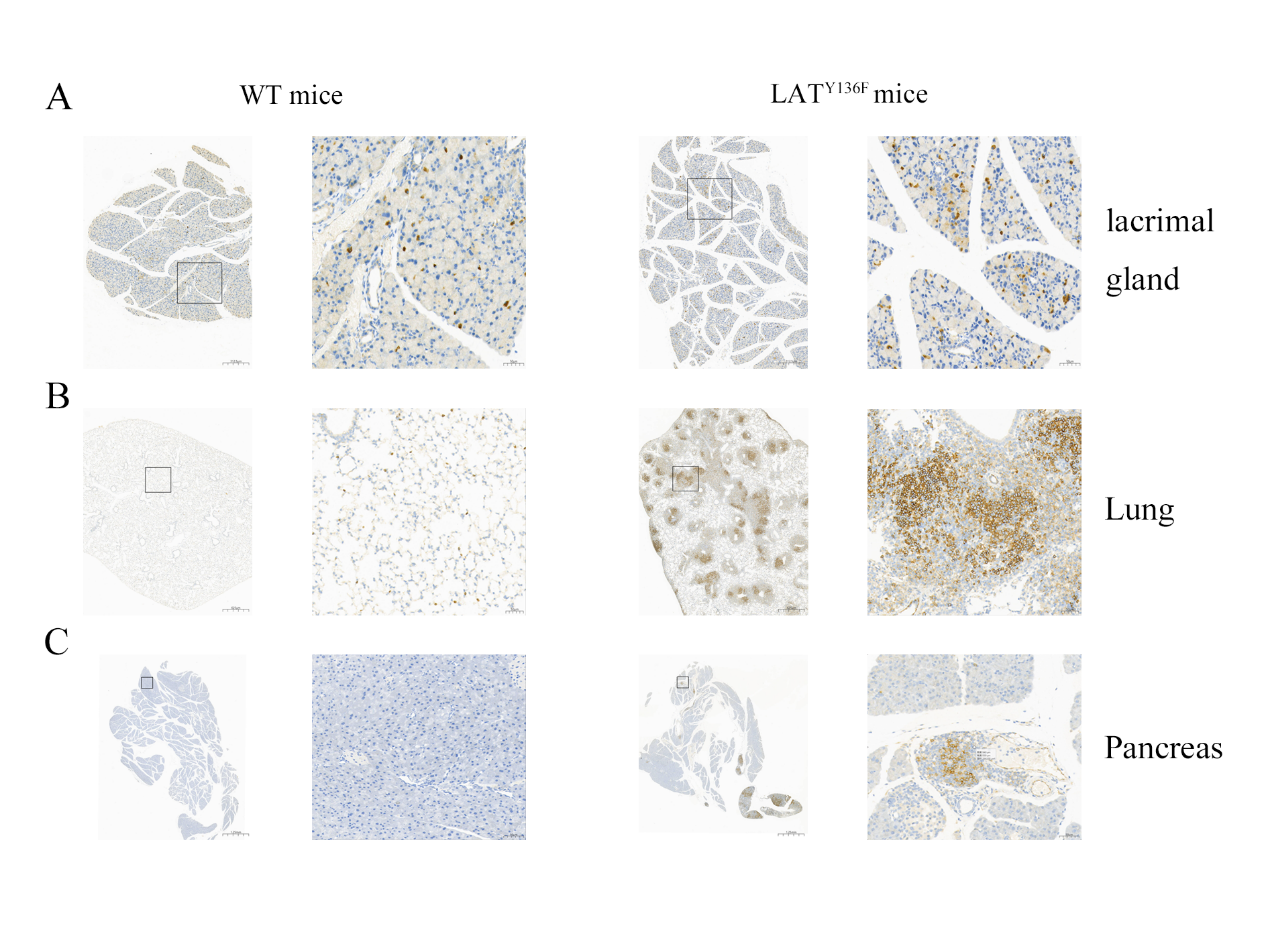
**

**Supplementary Figure 2. B Cell Overexpression in the Lacrimal Gland, Lung, and Pancreas of LatY136F Mice. A-C.** Representative immunohistochemical staining for B cells (CD19+) in the lacrimal gland (A), lung (B), and pancreas (C) from LATY136F and control mice. Scale bar = 50 μm.

**
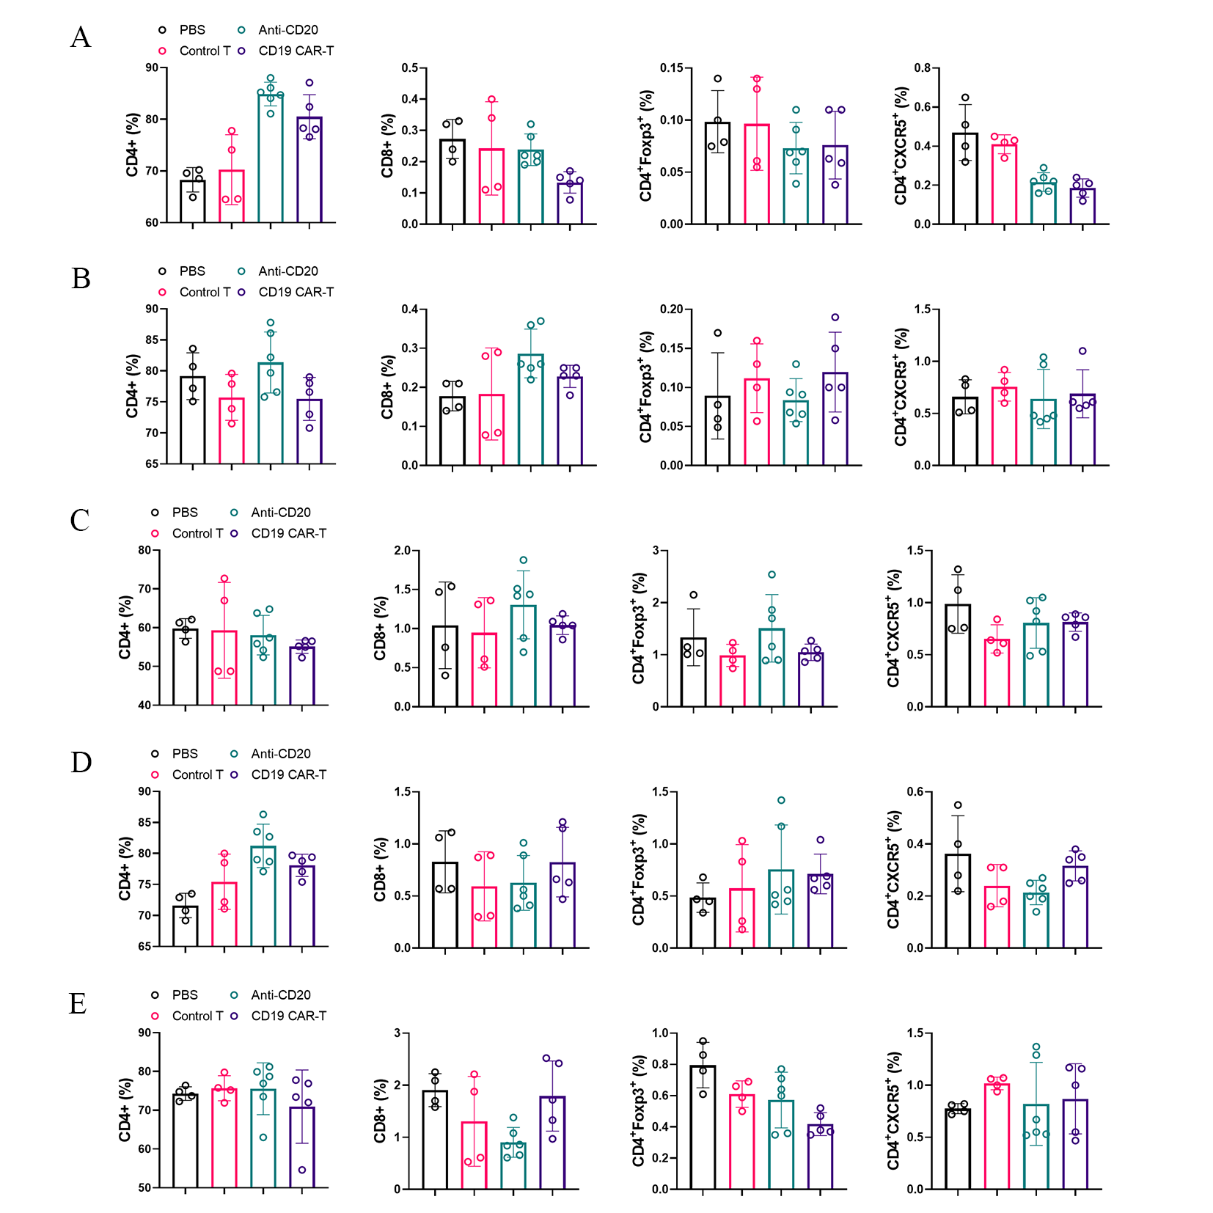
**

**Supplementary Figure 3. Endogenous T Cell Response Based on Treatment. A-E.** Flow cytometric analysis of the percentage of CD4+ T cells, CD8+ T cells, CD4+Foxp3+ Treg cells, and CD4+CXCR5+ Tfh cells in peripheral blood (A), spleen (B), lacrimal gland (C), lung (D), and pancreas (E) at 10 weeks post-transfer. N=4-6 per group.
